# Supplementary material for: Isolation of Lactococcus lactis from Whole Crop Rice and Determining Its Probiotic and Antimicrobial Properties towards Gastrointestinal Associated Bacteria
Source: MDPI journal article supplement (doi:10.3390/microorganisms9122513), 2021-12-03
Supplement: s1 [file s1]

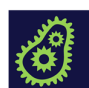

## Supplementary materials

Table S1. Physiochemical features of identified isolates RWP-3 and RWP-7.

| Code  | Stain    | motile | shape | Catalase | Growth Condition      | Strain             | species       |
|-------|----------|--------|-------|----------|-----------------------|--------------------|---------------|
| RWP-3 | Positive | Non    | Cocci | Negative | Facultative anaerobic | <i>Lactococcus</i> | <i>lactis</i> |
| RWP-7 | Positive | Non    | Cocci | Negative | Facultative anaerobic | <i>Lactococcus</i> | <i>lactis</i> |

Table S2. Different carbohydrate substrates fermentation by RWP-3 and RWP-7.

| S.No | Substrates                    | RWP-3 | RWP-7 |
|------|-------------------------------|-------|-------|
| 1    | Glycerol                      | ++    | ++    |
| 2    | Erythritol                    | +     | NF    |
| 3    | D-Arabinose                   | +     | NF    |
| 4    | L-Arabinose                   | ++    | ++    |
| 5    | D-Ribose                      | +++   | ++    |
| 6    | D-Xylose                      | +++   | +++   |
| 7    | L-Xylose                      | +++   | +++   |
| 8    | D-Adonitol                    | +     | NF    |
| 9    | Methyl- $\beta$ -D-xiloside   | +     | NF    |
| 10   | D-Galactose                   | ++    | ++    |
| 11   | D-Glucose                     | +++   | +++   |
| 12   | D-Fructose                    | +++   | +++   |
| 13   | D-Mannose                     | +++   | +++   |
| 14   | L-Sorbose                     | +     | NF    |
| 15   | L-Rhamnose                    | ++    | +     |
| 16   | Dulcitol                      | +     | +     |
| 17   | Inositol                      | +     | NF    |
| 18   | D-Mannitol                    | ++    | NF    |
| 19   | D-Sorbitol                    | NF    | NF    |
| 20   | Methyl- $\alpha$ D-mannoside  | NF    | +     |
| 21   | Methyl- $\alpha$ -D-glucoside | NF    | +     |
| 22   | N-acetyl glucosamine          | +++   | +     |
| 23   | Amygdalin                     | ++    | NF    |
| 24   | Arbutin                       | +++   | +++   |
| 25   | Esculin ferric citrate        | +++   | ++    |
| 26   | Salicin                       | +++   | +++   |
| 27   | D-Celiobiose                  | +++   | +++   |
| 28   | D-Maltose                     | +++   | +++   |
| 29   | D-Lactose                     | ++    | NF    |
| 30   | D-Melibiose                   | ++    | +     |
| 31   | D-Saccharose                  | +++   | +++   |
| 32   | D-Trehalose                   | ++    | NF    |
| 33   | Inulin                        | ++    | ++    |
| 34   | D-Melezitose                  | NF    | NF    |
| 35   | D-Raffinose                   | ++    | NF    |
| 36   | Amidon                        | +     | ++    |
| 37   | Glycogen                      | ++    | NF    |
| 38   | Xylitol                       | ++    | NF    |
| 39   | Gentiobiose                   | ++    | NF    |
| 40   | D-Turanose                    | NF    | NF    |

|    |                           |     |    |
|----|---------------------------|-----|----|
| 41 | D-Lyxose                  | NF  | NF |
| 42 | D-Tagatose                | ++  | NF |
| 43 | D-Fucose                  | +   | NF |
| 44 | L-Fucose                  | +   | NF |
| 45 | D-Arabitol                | +   | NF |
| 46 | L-Arabitol                | +   | NF |
| 47 | Potassium gluconate       | ++  | NF |
| 48 | Potassium 2-Ketogluconate | +++ | ++ |
| 49 | Potassium 5-Ketogluconate | NF  | ++ |

+ Low; ++ medium; +++ strong fermentation; NF: Not fermented.

**Table S3.** Production of extra cellular enzyme by RWP-3 and RWP-7.

| S.No | Enzymes                           | RWP3 | RWP7 |
|------|-----------------------------------|------|------|
| 1    | Control                           | 0    | 0    |
| 2    | Alkaline phosphatase              | +++  | +++  |
| 3    | Esterase (C <sub>4</sub> )        | +++  | +++  |
| 4    | Esterase lipase (C <sub>8</sub> ) | +++  | +++  |
| 5    | Lipase (C <sub>14</sub> )         | ++   | ++   |
| 6    | Leucine arylamidase               | +++  | +++  |
| 7    | Valine arylamidase                | ++   | ++   |
| 8    | Cystine arylamidase               | ++   | ++   |
| 9    | Trypsin-like serine protease      | ++   | 0    |
| 10   | $\alpha$ -Chymotrypsin            | ++   | 0    |
| 11   | Acid phosphatase                  | +++  | +++  |
| 12   | Naphthol-AS-biphosphohydrolase    | +++  | +++  |
| 13   | $\alpha$ -Galactosidase           | ++   | ++   |
| 14   | $\beta$ -Galactosidase            | ++   | ++   |
| 15   | $\beta$ -Glucuronidase            | 0    | 0    |
| 16   | $\alpha$ -Glucosidase             | 0    | 0    |
| 17   | $\beta$ -Glucosidase              | 0    | 0    |
| 18   | n acetyl $\beta$ glucosaminidase  | 0    | 0    |
| 19   | $\alpha$ -Mannosidase             | 0    | 0    |
| 20   | $\alpha$ -Fucosidase              | 0    | 0    |

++ Medium; +++ strong production.

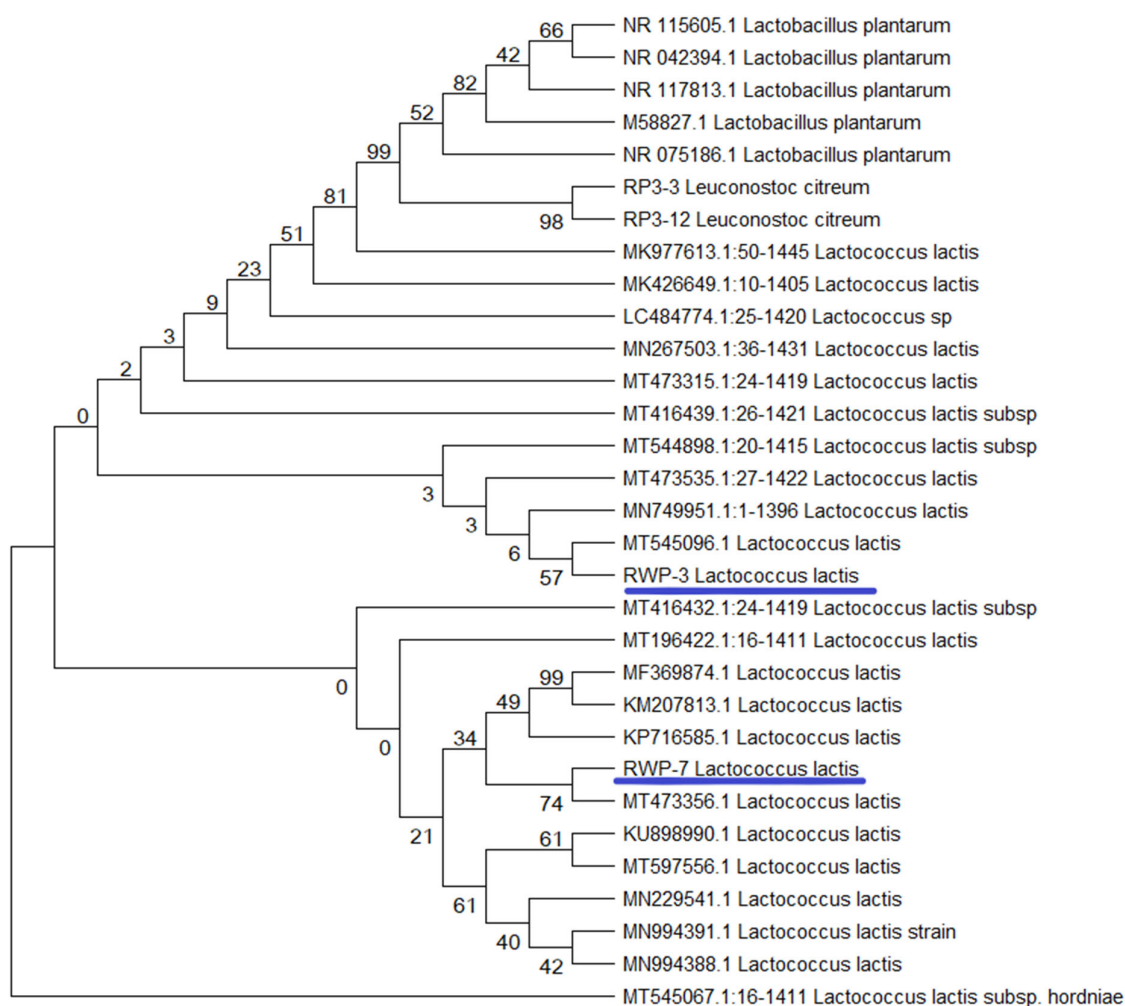

**Figure S1.** Phylogenetic tree based on 16S rRNA sequences, showing the relationship between different *Lactococcus lactis* and other *Lactobacillus* sp, constructed by the neighbor-joining method using Molecular Evolutionary Genetics Analysis -11 (Mega-11 version).
